# Supplementary material
Source: PubMed Central journal article supplement (PMC8738109)
Supplement: NIHMS1734068-supplement-1.pdf [file NIHMS1734068-supplement-1.pdf]

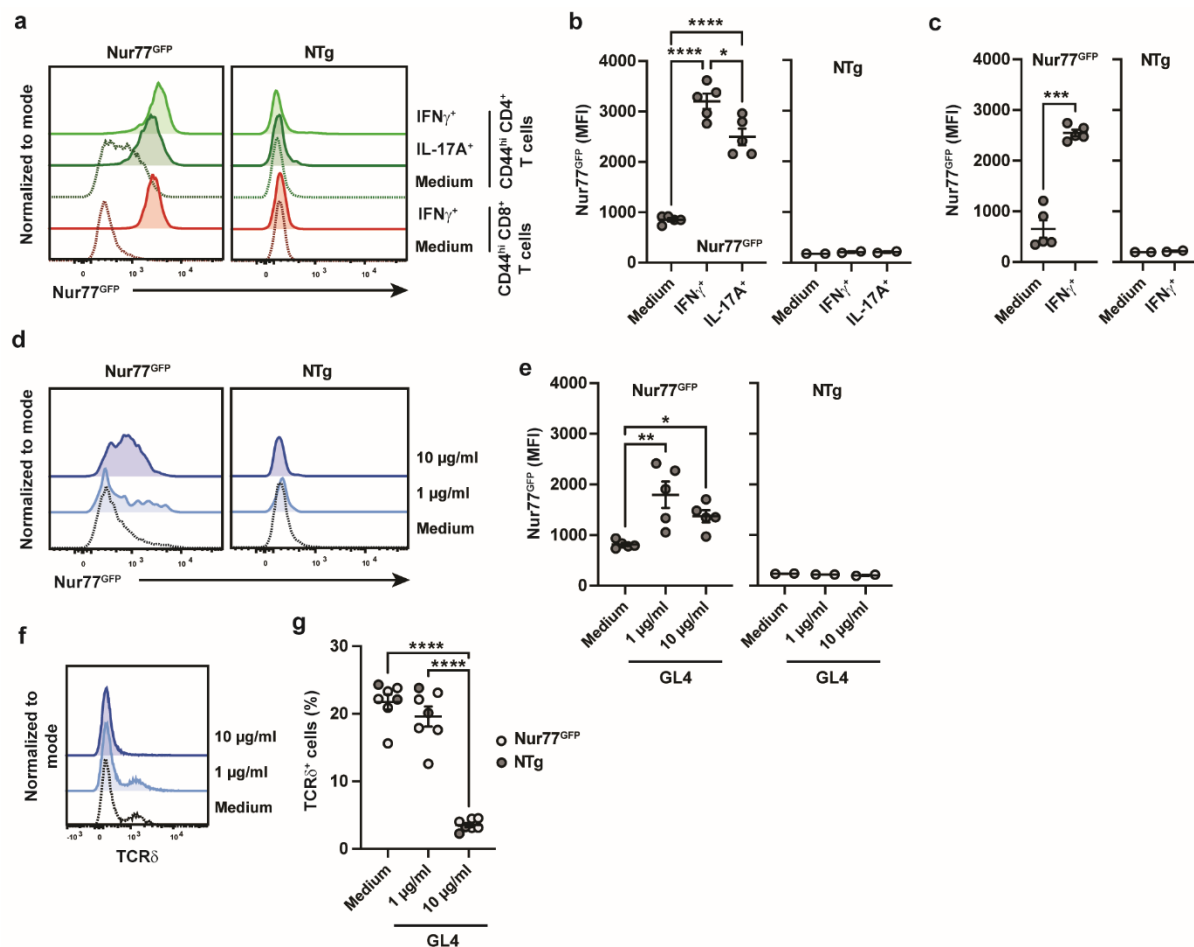

**Figure S1. Nur77<sup>GFP</sup> expression among unconventional T cells after TCR engagement.** MLN single cell suspensions from *Lm*-immune Nur77<sup>GFP</sup> and non-transgenic (NTg) mice were left unstimulated (medium) or stimulated with plate-bound  $\alpha$ CD3 $\epsilon$  and soluble  $\alpha$ CD28 mAbs or with plate-bound GL4 mAb for 6 hours. (a to c) Nur77<sup>GFP</sup> expression was analyzed among conventional T cells. (a) Representative histograms of Nur77<sup>GFP</sup> expression in the indicated populations. (b) Nur77<sup>GFP</sup> MFI among unstimulated CD44<sup>hi</sup> CD4<sup>+</sup> and activated CD44<sup>hi</sup> CD4<sup>+</sup> T cells producing either IL-17A or IFN $\gamma$  after stimulation. (c) Nur77<sup>GFP</sup> expression among unstimulated and activated IFN $\gamma$ <sup>+</sup> CD44<sup>hi</sup> CD8 $\alpha$ <sup>+</sup> T cells. (d and e) Nur77<sup>GFP</sup> expression was analyzed among CD44<sup>hi</sup> CD27<sup>neg</sup> CD19<sup>-</sup> CD4<sup>-</sup> CD8 $\alpha$ <sup>-</sup> lymphocytes. (d) Representative histograms of Nur77<sup>GFP</sup> expression in unstimulated and IL-17A<sup>+</sup> cells upon stimulation with 1 or 10  $\mu$ g/ml of coated GL4 mAb. (e) Scatter plots show Nur77<sup>GFP</sup> MFI among the groups indicated in (d). (f and g) TCR $\delta$  expression among CD19<sup>-</sup> CD4<sup>-</sup> CD8 $\alpha$ <sup>-</sup> cells left unstimulated (medium) or stimulated with the indicated concentration of GL4 mAb. (f) Representative histograms of TCR $\delta$  expression are shown. (g) Scatter plots show the frequency of TCR $\delta$ <sup>+</sup> cells among CD19<sup>-</sup> CD4<sup>-</sup> CD8 $\alpha$ <sup>-</sup> cells. All data are from 1 experiment with 5 Nur77<sup>GFP</sup> and 2 NTg mice. Statistical analyses were only performed for Nur77<sup>GFP</sup> mice. \*,  $p \leq 0.05$ ; \*\*,  $p \leq 0.01$ ; \*\*\*,  $p \leq 0.0001$

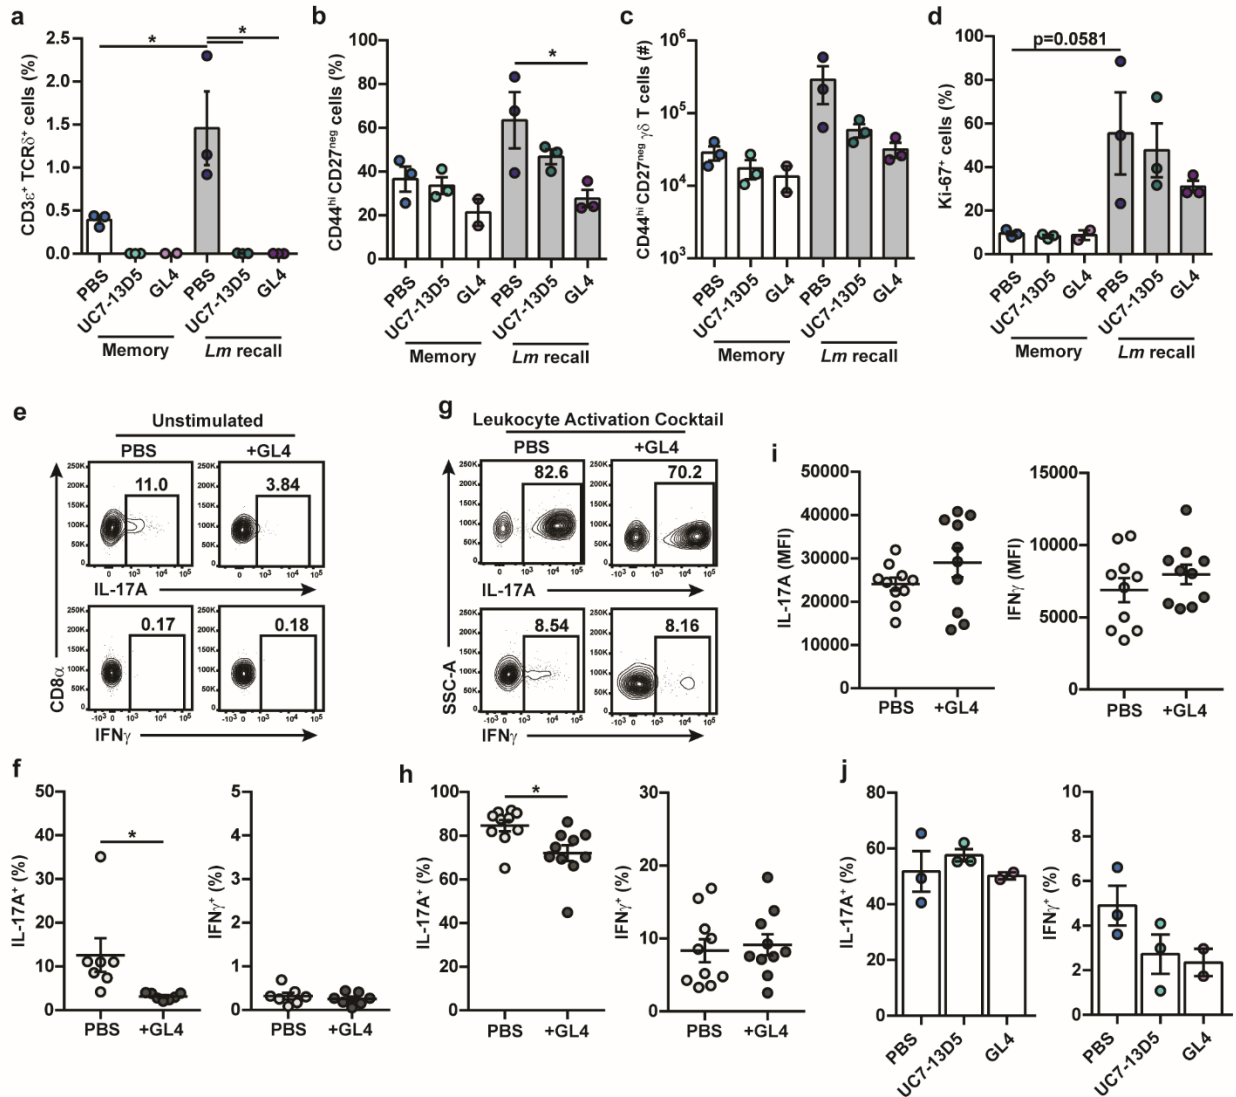

**Figure S2. Antibody-mediated  $\gamma\delta$ TCR internalization diminishes CD44<sup>hi</sup> CD27<sup>neg</sup>  $\gamma\delta$  T cell proliferation while minimally impacting cytokine production during recall response to *Lm*.** *Lm*-immune *Tcrd*-H2B-eGFP (Balb/c background) mice were i.p. injected with either PBS, UC7-13D5 or GL4 mAb on days -3, -1 and +1 relative to recall infection. On day 0, mice were challenged with *Lm* ("*Lm* recall") or given PBS ("*Lm* Memory").  $\gamma\delta$  T cells (identified as TCR $\beta$ <sup>neg</sup> CD8 $\alpha$ <sup>neg</sup> GFP<sup>+</sup> single live lymphocytes) were analyzed 4 to 5 days later in the MLN. (a) The graph shows the mean  $\pm$  SEM (n=2-3 mice/group) of the frequency of CD3 $\epsilon^+$  TCR $\delta^+$  cells among single live lymphocytes. (b-c) The frequency (b) and number (c) of CD44<sup>hi</sup> CD27<sup>neg</sup>  $\gamma\delta$  T cells are shown as the mean  $\pm$  SEM. (d) CD44<sup>hi</sup> CD27<sup>neg</sup>  $\gamma\delta$  T cells were analyzed for Ki-67 expression. The graph shows the mean  $\pm$  SEM of Ki-67<sup>+</sup> cell frequency. (e-j) Single cell suspensions from MLN were left unstimulated in the presence of BD GolgiPlug (e and f) or stimulated with BD Leukocyte activation cocktail (g-j) for 4 hours. CD44<sup>hi</sup> CD27<sup>neg</sup>  $\gamma\delta$  T cell cytokine production was analyzed by flow cytometry. Representative flow plots of IL-17A and IFN $\gamma$  production are shown (e and g). Cumulative data are shown as the mean  $\pm$  SEM (n=3-4 mice/group) of cytokine<sup>+</sup> cell frequency (f and h) and MFI (i) and depict 2-3 independent experiments. (j) Graphs show the mean  $\pm$  SEM of cytokine<sup>+</sup> cell frequency after 4-hour stimulation with BD Leukocyte activation cocktail. \*,  $p \leq 0.05$

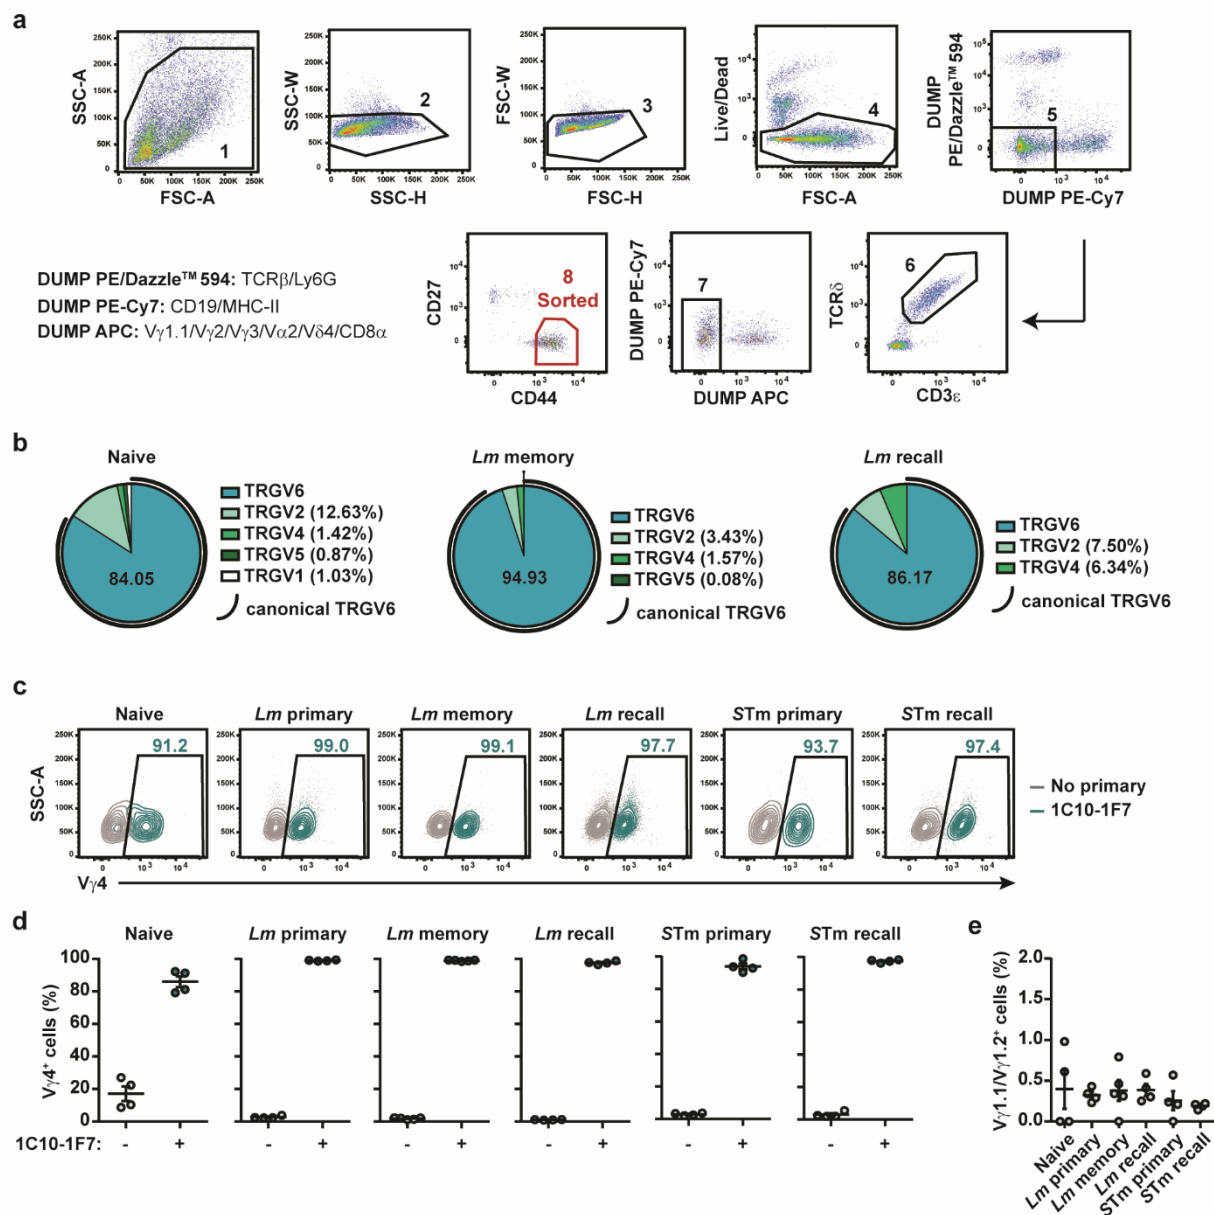

**Figure S3. The vast majority of sorted CD44<sup>hi</sup> CD27<sup>neg</sup>  $\gamma\delta$  T cells express the V $\gamma$ 4 TCR.** (a) Schematic of the gating strategy used to sort purify adaptive  $\gamma\delta$  T cells. The numbers within the plots correspond to the gating hierarchy. (b) *Lm*-elicited  $\gamma\delta$  T cells in the MLN of infected Balb/c mice were sort-purified >30 days after primary infection (Memory) or 5 days after secondary infection (Recall). Naïve adaptive  $\gamma\delta$  T cells were sorted from the MLN, spleen and pLN (n=4-34 mice/group, 1 biological sample). CDR3 $\gamma$  transcripts were sequenced. Pie charts represent the percent of total reads mapping to the TCR $\gamma$  usage in each sample. (c-e) MLN cells (*Lm* and STm samples) and mixed MLN, pLN and splenocytes (Naïve) were stained with the V $\gamma$ 4-specific antibody 1C10-1F7 or left unstained. Adaptive  $\gamma\delta$  T cells were identified using the strategy shown in (a) and analyzed for 1C10-1F7 or V $\gamma$ 1.1/V $\gamma$ 1.2 staining. Representative flow plot overlays of 1C10-1F7 and no primary control staining are shown in (c). Scatter plots in (d) and (e) show the mean  $\pm$  SEM (n=4-6 mice/group) of the percentage of V $\gamma$ 4<sup>+</sup> and V $\gamma$ 1.1/V $\gamma$ 1.2<sup>+</sup> cells, respectively.

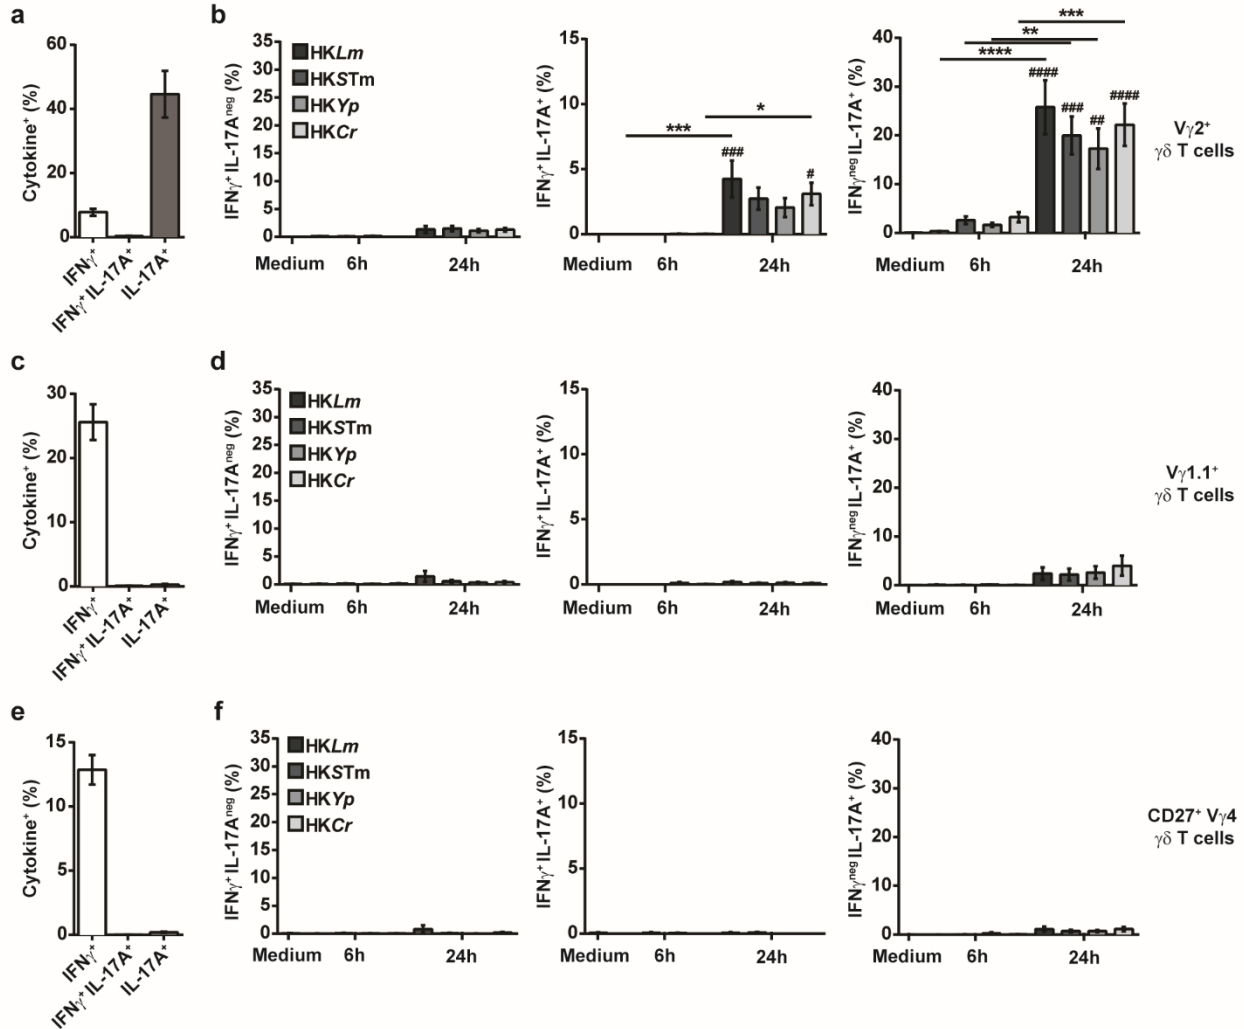

**Figure S4. Cytokine production among  $\gamma\delta$  T cell subsets in response to heat-killed bacteria.** Single cell suspensions of MLN from *Lm*-immune mice were stimulated for 6 hours with Leukocyte Activation Cocktail (PMA, ionomycin, and brefeldin A; a, c and e) or 6 and 24 hours with the indicated heat-killed (HK) bacteria at MOI 10 (b, d and f). (a and b)  $V\gamma 2^+$  T cells were analyzed for IL-17A and IFN $\gamma$  production. (c and d)  $V\gamma 1.1^+$  T cells were analyzed for IL-17A and IFN $\gamma$  production. (e and f) CD27 $^+$   $V\gamma 4$  T cells were analyzed for IL-17A and IFN $\gamma$  production. Bar graphs show the mean  $\pm$  SEM ( $n=4$  biological replicates/condition/experiment) of the percentage of cytokine-producing cells and depict the cumulative data of 2 independent experiments. \*,  $p \leq 0.05$ ; \*\*,  $p \leq 0.01$ ; \*\*\*,  $p \leq 0.001$ ; \*\*\*\*,  $p \leq 0.0001$

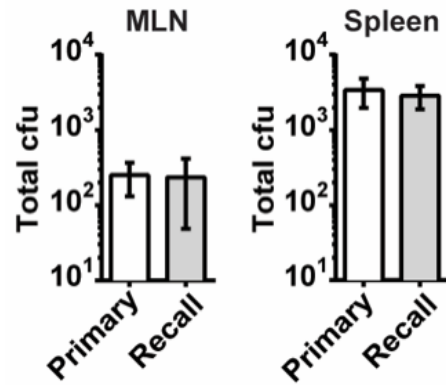

**Figure S5. Intraperitoneal *Cr* infection leads to early colonization of the MLN and spleen.** Naïve or *Lm*-immune mice were i.p. infected with *Cr*. Two days later, MLN and spleen colonization was evaluated. Bar graphs show the mean  $\pm$  SEM (n=3-4 mice/group) of the total cfu per organ.

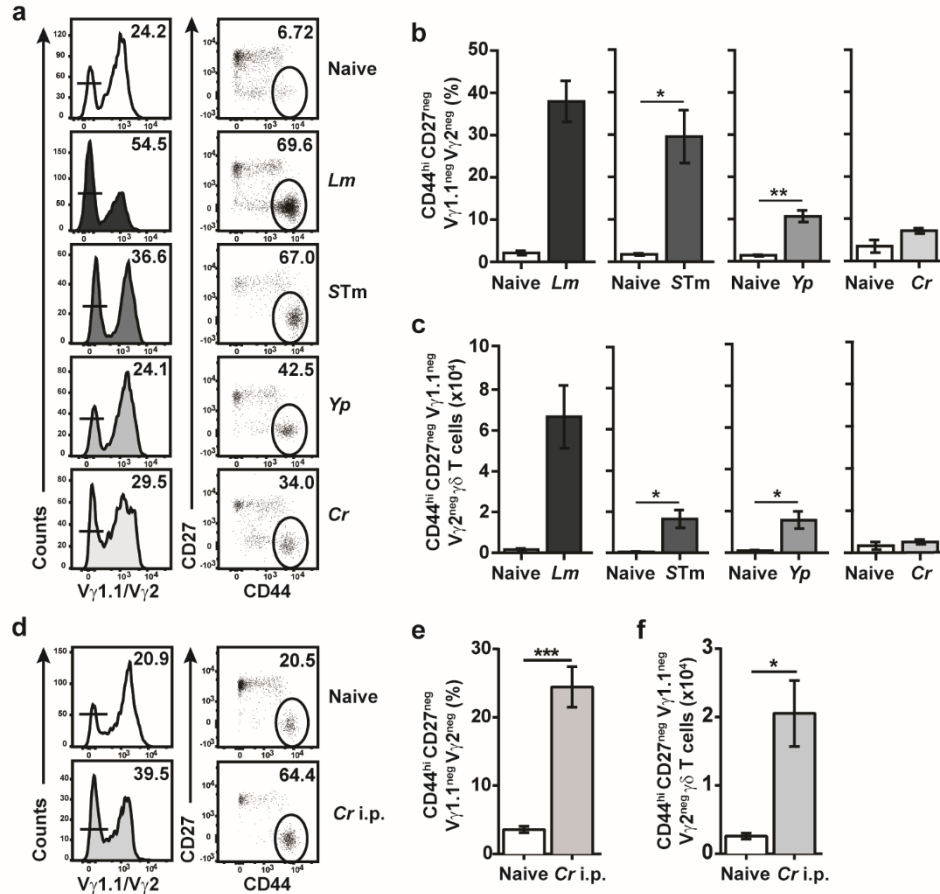

**Figure S6. Diverse bacterial infection can elicit adaptive  $\gamma\delta$  T cell responses.** (a-c) Mice were left uninfected or infected with *Lm*, *STm*, *Yp* and *Cr*.  $\gamma\delta$  T cells were analyzed by flow cytometry at 4 dpi (*STm*) or 9 dpi (*Lm*, *Yp*, and *Cr*). Representative flow plots are shown in (a). The naive mouse depicted was a control for the primary response to *Lm*. Data represent the mean  $\pm$  SEM ( $n=3-6$  mice/group, except for the naive group in the *Lm* panels which comprised 2 mice) of the percentage (b) and absolute number (c) of CD44<sup>hi</sup> CD27<sup>neg</sup> V $\gamma$ 4 T cells and are representative of 2 independent experiments. (d-f) Naïve mice were left uninfected or i.p. infected with *Cr* and  $\gamma\delta$  T cells analyzed in the MLN 9 days later. Representative flow plots are shown in (d). Data depict the mean  $\pm$  SEM ( $n=3-4$  mice/group) of the percentage (e) and absolute numbers (f) of CD44<sup>hi</sup> CD27<sup>neg</sup> V $\gamma$ 4 T cells from the pool of 2 independent experiments. \*,  $p \leq 0.05$ ; \*\*,  $p \leq 0.01$ ; \*\*\*,  $p \leq 0.001$

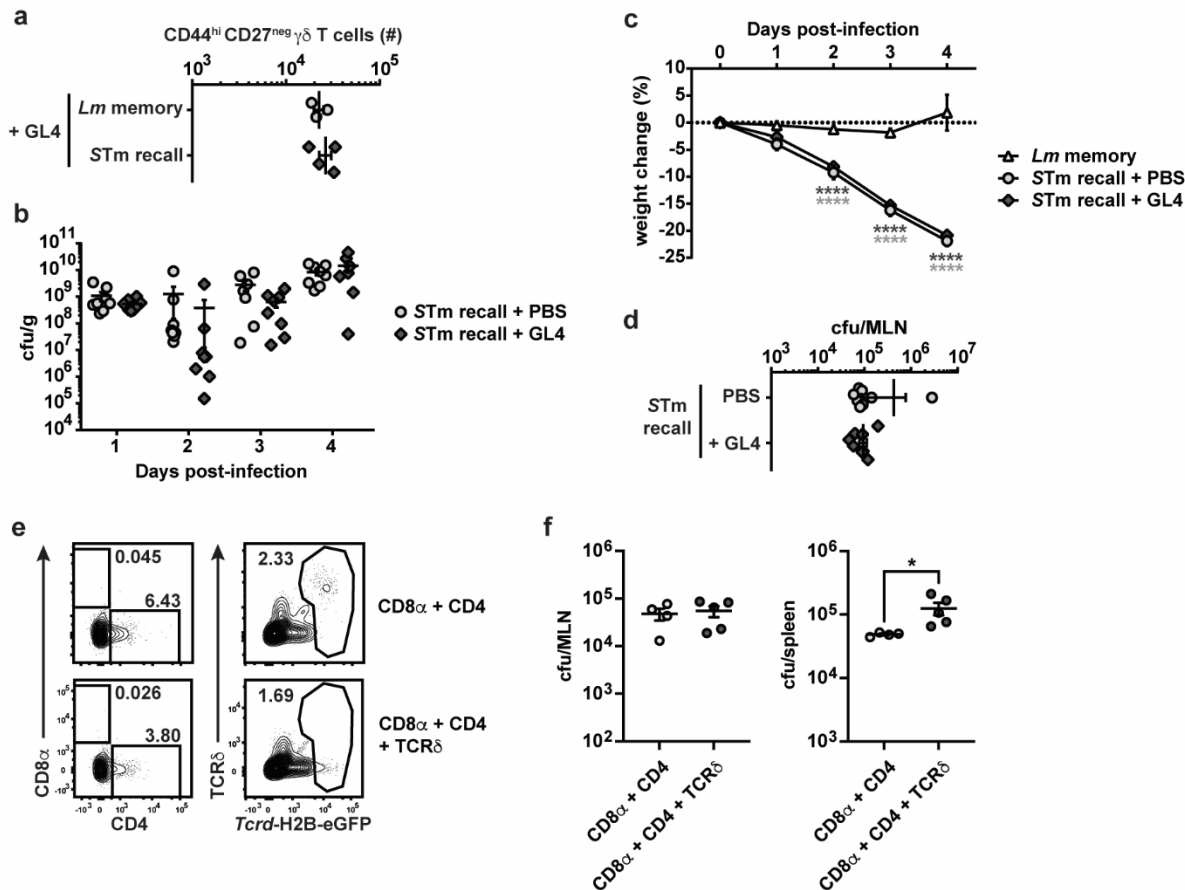

**Figure S7. GL4 treatment does not affect the course of STm infection in *Lm*-immune mice.** *Lm*-immune *Tcrd*-H2B-eGFP mice received 3 i.p. injections of PBS or GL4 mAb on days -3, -1 and +1 relative to STm infection. (a)  $\gamma\delta$  T cell numbers were evaluated from the MLN of GL4 treated mice at 4 dpi. Data show the mean  $\pm$  SEM of 3-4 mice/group. (b-c) Mice were followed daily for (b) STm fecal shedding and (c) weight loss. (d) At 4 dpi, STm colonization was evaluated in the MLN. Data are shown as mean  $\pm$  SEM and depict the cumulative data of 2 independent experiments with 3-4 mice/group. (e and f) *Lm*-immune *Tcrd*-H2B-eGFP mice received 3 i.p. injections of the indicated antibody cocktails on days -3, -1 and +1 relative to STm challenge infection. (e) Representative flow plots of CD4 and CD8 $\alpha$  expression among live single lymphocytes (left panel) and TCR $\delta$  and *Tcrd*-H2B-eGFP expression among CD4<sup>-</sup> CD8 $\alpha$ <sup>+</sup> lymphocytes (right panel) are shown. Analysis was performed on circulating cells. (f) STm colonization of the indicated tissues. Graphs show the mean  $\pm$  SEM of 1 experiment with 4-5 mice/group. \*,  $p \leq 0.05$ ; \*\*\*\*,  $p \leq 0.0001$

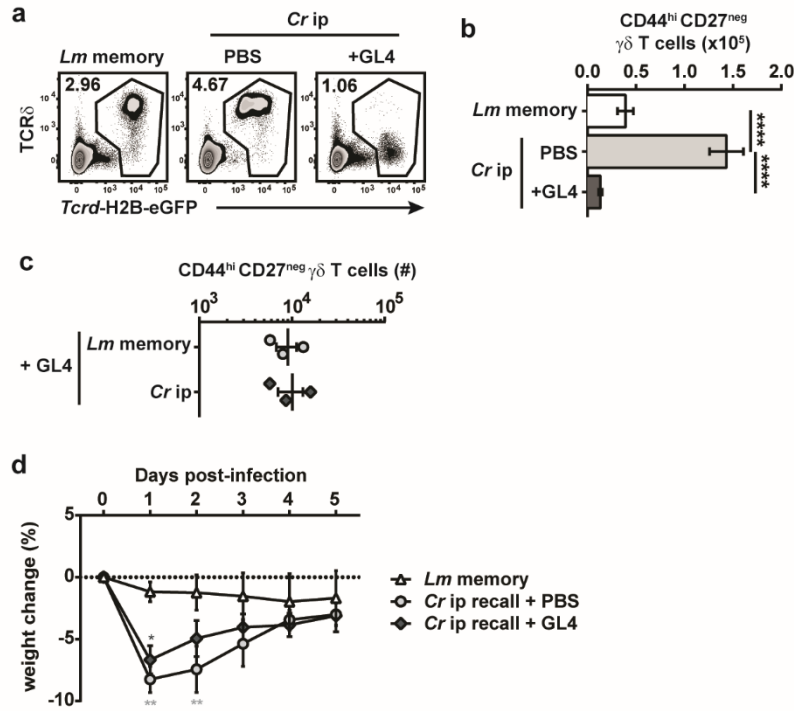

**Figure S8. *Lm*-elicited  $\gamma\delta$  T cell response to *Cr* i.p. is mediated by the  $\gamma\delta$ TCR.** *Lm*-immune *Tcrd*-H2B-eGFP mice received 3 i.p. injections of PBS (*Lm* memory and PBS groups) or GL4 mAb on days -3, -1 and +1 relative to i.p. *Cr* challenge (+GL4). Memory mice received 100  $\mu$ l PBS i.p. on day 0. Recall groups were challenged i.p. with *Cr* on day 0. (a) CD44<sup>hi</sup> CD27<sup>neg</sup>  $\gamma\delta$  T cells were analyzed after 5 days.  $\gamma\delta$  T cells were identified as CD4<sup>neg</sup> CD8 $\alpha$ <sup>neg</sup> GFP<sup>+</sup> single live lymphocytes. Representative flow plots are shown. (b) Data show the mean  $\pm$  SEM (n=3-4 mice/group/experiment) of CD44<sup>hi</sup> CD27<sup>neg</sup>  $\gamma\delta$  T cell absolute numbers at 5 dpi and depict the cumulative data of 2 independent experiments. (c) Comparison of CD44<sup>hi</sup> CD27<sup>neg</sup>  $\gamma\delta$  T cell absolute numbers in the MLN of GL4-treated *Lm*-immune and *Cr* challenged mice at 5 dpi (n=3 mice/group). (d) Mice were followed daily for weight loss (n=4 mice/group). \*,  $p \leq 0.05$ ; \*\*,  $p \leq 0.01$ ; \*\*\*\*,  $p \leq 0.0001$



**Table S1. Frequency of the non-canonical clones selected by STm primary infection in Figure 7f at each analyzed time point.** Sequences are sorted by abundance at the STm primary time point. Sequences that increase in both STm primary and recall conditions are shown in bold.

| Sequence               | % of other non-canonical reads |                      |                |                     |                     |               |
|------------------------|--------------------------------|----------------------|----------------|---------------------|---------------------|---------------|
|                        | Naïve                          | <i>Lm</i><br>primary | STm<br>primary | <i>Lm</i><br>memory | <i>Lm</i><br>recall | STm<br>recall |
| GSDRRDTTDKLV           | 4.506                          | 8.232                | 7.171          | 8.644               | 9.667               | 4.070         |
| GSDTEGSSWDTRQMF        | 0                              | 0.440                | 0.070          | 0                   | 0.004               | 0             |
| GSDIGGIRVTDKLV         | 0.023                          | 0.048                | 0.047          | 0.059               | 4.167               | 0.043         |
| GSGRRDTTDKLV           | 0.013                          | 0.025                | 0.033          | 0.010               | 0.027               | 0.007         |
| GSDRGDATDKLV           | 0                              | 0.031                | 0.031          | 0                   | 0.004               | 0             |
| GSGRRDSDKLV            | 0.004                          | 0.016                | 0.029          | 0.026               | 0.028               | 0             |
| GSDRGDTTDKLV           | 0.013                          | 0.025                | 0.023          | 0.013               | 0.012               | 0             |
| GSDVGGTDKLV            | 0                              | 0.008                | 0.016          | 0.009               | 0.010               | 0.009         |
| <b>GSDIGIRAADKLV</b>   | 0                              | 0.004                | 0.006          | 0                   | 0.020               | 0.017         |
| GSDIGGITNKLV           | 0                              | 0.003                | 0.004          | 0                   | 0.003               | 0             |
| <b>GSDIGGSPRDTRQMF</b> | 0                              | 0.003                | 0.004          | 0                   | 0.003               | 0.004         |
| GSDRRDTGSDWTRQMF       | 0                              | 0.003                | 0.004          | 0.005               | 0.005               | 0             |
| <b>GSDVGGTTDKLV</b>    | 0                              | 0.008                | 0.004          | 0                   | 0.008               | 0.011         |
| GSGRDTSSWDTRQMF        | 0                              | 0.007                | 0.004          | 0                   | 0.005               | 0             |
| <b>GSDIGGTIDKLV</b>    | 0                              | 0.008                | 0.004          | 0                   | 0.013               | 0.013         |
| <b>GSDRRDTADKLV</b>    | 0                              | 0.014                | 0.004          | 0                   | 0.004               | 0.010         |

**Table S2. Frequency of the non-canonical clones selected by STm recall infection in Figure 7f at each analyzed time point.** Sequences are sorted by abundance at the STm recall time point. Sequences that increase in both STm primary and recall conditions are shown in bold.

| Sequence               | % of other non-canonical reads |                      |                |                     |                     |               |
|------------------------|--------------------------------|----------------------|----------------|---------------------|---------------------|---------------|
|                        | Naïve                          | <i>Lm</i><br>primary | STm<br>primary | <i>Lm</i><br>memory | <i>Lm</i><br>recall | STm<br>recall |
| GSDIGGTDKLV            | 9.147                          | 10.231               | 7.258          | 6.257               | 8.102               | 19.865        |
| GSDIGGSFWDTRQMF        | 0.406                          | 0.420                | 0.353          | 0.388               | 0.400               | 0.409         |
| GSDIGGSYWDTRQMF        | 0.143                          | 0.161                | 0.111          | 0.160               | 0.166               | 0.172         |
| GSDFGGSSWDTRQMF        | 0.061                          | 0.0786               | 0.054          | 0.045               | 0.055               | 0.072         |
| GSDIGGIATDKLV          | 0.004                          | 3.850                | 0.004          | 0                   | 1.044               | 0.030         |
| GSDRGDTDKLV            | 0.019                          | 0.046                | 0              | 0.018               | 0.036               | 0.026         |
| <b>GSDIGIRAADKLV</b>   | 0                              | 0.004                | 0.006          | 0                   | 0.020               | 0.017         |
| <b>GSDIGGTIDKLV</b>    | 0                              | 0.008                | 0.004          | 0                   | 0.013               | 0.013         |
| GSGIGGSSWDTRQMF        | 0.004                          | 0.010                | 0              | 0.005               | 0.016               | 0.013         |
| <b>GSDRRDTADKLV</b>    | 0                              | 0.014                | 0.004          | 0                   | 0.004               | 0.011         |
| <b>GSDVGGTTDKLV</b>    | 0                              | 0.008                | 0.004          | 0                   | 0.008               | 0.011         |
| GSGTGGSSWDTRQMF        | 0                              | 0.014                | 0              | 0                   | 0.004               | 0.004         |
| GSDIGGIGKLV            | 0                              | 0.013                | 0              | 0                   | 0.010               | 0.004         |
| <b>GSDIGGSPRDTRQMF</b> | 0                              | 0.003                | 0.004          | 0                   | 0.003               | 0.004         |

**Table S3. Bacterial strains and infection doses.**

| <b>BACTERIA</b>                                    | <b>STRAIN</b> | <b>INFECTION DOSE (CFU)</b>                                                                                                             | <b>REFERENCES</b> |
|----------------------------------------------------|---------------|-----------------------------------------------------------------------------------------------------------------------------------------|-------------------|
| <i>InlA<sup>M</sup> Listeria monocytogenes</i>     | EGDe          | Primary: $2 \times 10^9$<br>Secondary: $2 \times 10^{10}$                                                                               | (1)               |
| <i>InlA<sup>M</sup> Listeria monocytogenes</i>     | 10403s        | GF mice - Primary: $1 \times 10^8$ gavage<br>Nur77 <sup>GFP</sup> and NTg – Primary: $2 \times 10^9$<br>– Secondary: $2 \times 10^{11}$ | (2)               |
| <i>Salmonella enterica</i><br>serovar Typhimurium  | IR715         | Primary and secondary:<br>$1 \times 10^8$                                                                                               | (3)               |
| <i>Yersinia pseudotuberculosis</i><br>serogroup O1 | 32777         | Primary: $5 \times 10^7$<br>Secondary: $1 \times 10^8$                                                                                  | (4)               |
| <i>Citrobacter rodentium</i>                       | DBS100        | Primary and secondary:<br>$1 \times 10^9$ oral<br>$1 \times 10^7$ i.p.                                                                  | (5)               |

**Table S4. List of antibodies used in this study.**

| <b>Marker</b>                 | <b>Conjugate</b> | <b>Clone</b> | <b>Company</b>                          |
|-------------------------------|------------------|--------------|-----------------------------------------|
| anti-mouse IgG                | FITC             | Poly4060     | BioLegend                               |
| CD3 $\epsilon$                | PE/Cy7           | 145-2C11     | BioLegend                               |
| CD3 $\epsilon$                | BV421            | 145-2C11     | BioLegend                               |
| CD3 $\epsilon$                | PE/Dazzle™ 594   | 145-2C11     | BioLegend                               |
| CD3 $\epsilon$                | BV711            | 145-2C11     | BioLegend                               |
| CD4                           | Purified         | GK1.5        | Bio X Cell                              |
| CD4                           | Biotin           | GK1.5        | BioLegend                               |
| CD4                           | PE/Cy7           | RM4-4        | BioLegend                               |
| CD8 $\alpha$                  | Purified         | 2.43         | Bio X Cell                              |
| CD8 $\alpha$                  | Biotin           | 53-6.7       | BioLegend                               |
| CD8 $\alpha$                  | APC              | 53-6.7       | BioLegend                               |
| CD8 $\alpha$                  | PE               | 53-6.7       | BioLegend                               |
| CD8 $\alpha$                  | BV785            | 53-6.7       | BioLegend                               |
| CD16/CD32                     | Purified         | 2.4G2        | Bio X Cell                              |
| CD19                          | PE/Cy7           | 6D5          | BioLegend                               |
| CD27                          | PerCP/Cy5.5      | LG.3A10      | BioLegend                               |
| CD44                          | APC-eFluor 780   | IM7          | eBioscience                             |
| B220                          | Biotin           | RA3-6B2      | BioLegend                               |
| I-A/I-E                       | PE/Cy7           | M5/114.15.2  | BioLegend                               |
| IFN $\gamma$                  | PE/Cy7           | XMG1.2       | BioLegend                               |
| IL-17A                        | APC              | TC11-18H10.1 | BioLegend                               |
| Ki-67                         | PE/Dazzle™ 594   | 16A8         | BioLegend                               |
| Ly6G                          | PE/Dazzle™ 594   | 1A8          | BioLegend                               |
| Phospho-Zap 70/Syk            | PE               | n3kobu5      | Invitrogen                              |
| TCR $\beta$                   | PE/Dazzle™ 594   | H57-597      | BioLegend                               |
| TCR $\beta$                   | BV711            | H57-597      | BioLegend                               |
| TCR $\delta$                  | BV421            | GL3          | BioLegend                               |
| TCR $\delta$                  | PE               | GL3          | BioLegend                               |
| TCR $\delta$                  | APC              | GL3          | BioLegend                               |
| TCR $\delta$                  | Purified         | GL4          | Bio X Cell (Custom)                     |
| TCR $\delta$                  | Purified         | UC7-13D5     | Bio X Cell                              |
| V $\alpha$ 2                  | APC              | B20.1        | BioLegend                               |
| V $\delta$ 4                  | APC              | REA372       | Miltenyi Biotec                         |
| V $\gamma$ 1.1                | FITC             | 2.11         | BioLegend                               |
| V $\gamma$ 1.1                | APC              | 2.11         | BioLegend                               |
| V $\gamma$ 1.1/V $\gamma$ 1.2 | PE               | 4B2.9        | BioLegend                               |
| V $\gamma$ 2                  | FITC             | UC3-10A6     | BioLegend                               |
| V $\gamma$ 2                  | PE               | UC3-10A6     | BioLegend                               |
| V $\gamma$ 2                  | APC              | UC3-10A6     | BioLegend                               |
| V $\gamma$ 3                  | APC              | 536          | BioLegend                               |
| V $\gamma$ 4                  | Purified         | 1C10-1F7     | Provided by Dr. Hatano and Dr. Yoshikai |

## SI References

1. T. Wollert *et al.*, Extending the host range of *Listeria monocytogenes* by rational protein design. *Cell* **129**, 891-902 (2007).
2. B. S. Sheridan *et al.*, gammadelta T cells exhibit multifunctional and protective memory in intestinal tissues. *Immunity* **39**, 184-195 (2013).
3. P. A. McLaughlin *et al.*, Inflammatory monocytes provide a niche for *Salmonella* expansion in the lumen of the inflamed intestine. *PLoS Pathog* **15**, e1007847 (2019).
4. Y. Zhang, C. Khairallah, B. S. Sheridan, A. W. M. van der Velden, J. B. Bliska, CCR2(+) Inflammatory Monocytes Are Recruited to *Yersinia pseudotuberculosis* Pyogranulomas and Dictate Adaptive Responses at the Expense of Innate Immunity during Oral Infection. *Infect Immun* **86** (2018).
5. B. A. Vallance, W. Deng, K. Jacobson, B. B. Finlay, Host susceptibility to the attaching and effacing bacterial pathogen *Citrobacter rodentium*. *Infect Immun* **71**, 3443-3453 (2003).
